# Supplementary material for: Sequence/structural analysis of xylem proteome emphasizes pathogenesis-related proteins, chitinases and β-1, 3-glucanases as key players in grapevine defense against Xylella fastidiosa
Source: PeerJ. 2016 May 24;4:e2007. doi: 10.7717/peerj.2007 (PMC4888286; doi:10.7717/peerj.2007)
Supplement: File S1 — Raw data of protein identification and quantification obtained with PROPHET and Scaffold. [file peerj-04-2007-s003.xlsx]

## Sheet: Scaffold identified proteins
Protein	NI1	NI2	NI3	I1	I2	I3	BayesFactor	FoldChange	FDR
tr|F6HLL8|F6HLL8_VITVI	72	67	5	235	99	111	516750	1.04	0
tr|F6HBN7|F6HBN7_VITVI	0	0	0	22	16	22	83420.6	2.156	0
tr|A5BK69|A5BK69_VITVI	9	10	2	82	15	44	6357.17	1.49	0
tr|A5BNW5|A5BNW5_VITVI	0	0	0	24	9	16	3834.39	2.028	0
tr|D7TML8|D7TML8_VITVI	65	58	1	101	68	63	260.997	0.641	0
tr|F6GZC4|F6GZC4_VITVI	202	196	216	168	160	141	247.497	-0.424	0
tr|A5C594|A5C594_VITVI	3	1	1	13	7	27	225.901	1.354	0
tr|A5AWT7|A5AWT7_VITVI	12	6	14	4	1	4	111.662	-1.057	0
tr|E0CQL6|E0CQL6_VITVI	69	76	2	111	63	60	23.819	0.393	0
tr|D7T548|D7T548_VITVI	2	3	0	18	7	3	16.069	1.006	0
tr|F6I6R4|F6I6R4_VITVI	93	99	72	116	72	55	14.209	-0.254	0
tr|D7SLG6|D7SLG6_VITVI	8	7	14	3	5	5	13.678	-0.741	0
tr|A5BJV9|A5BJV9_VITVI	24	23	55	30	15	9	9.471	-0.614	0
tr|F6H3K6|F6H3K6_VITVI	1	1	1	11	4	0	8.715	0.707	0
tr|F6HGW2|F6HGW2_VITVI	5	4	0	0	0	0	8.688	-1.065	0
tr|F6HLL9|F6HLL9_VITVI	0	1	0	30	0	2	5.633	0.869	0.00028
tr|F6HUM8|F6HUM8_VITVI	14	15	29	19	8	8	5.325	-0.55	0.00032
tr|F6HD61|F6HD61_VITVI	79	81	47	64	70	63	4.112	-0.22	0.00363
tr|A5BS35|A5BS35_VITVI	16	23	22	57	20	21	2.343	0.272	0.20915
sp|A7PQW3|E13B_VITVI	0	0	0	6	0	0	2.324	0.554	0.21649
tr|A5C816|A5C816_VITVI	4	3	2	13	4	4	2.165	0.492	0.287
sp|A7PZL3|PGLR_VITVI	0	1	0	5	2	3	2.131	0.863	0.30381
tr|D7TXF5|D7TXF5_VITVI	11	9	29	24	22	28	1.933	0.298	0.41043
tr|D7SXH0|D7SXH0_VITVI	0	1	0	7	0	1	1.873	0.632	0.4455
tr|F6HVL6|F6HVL6_VITVI	3	2	18	2	3	2	1.842	-0.589	0.4156
tr|F6H0Z1|F6H0Z1_VITVI	4	8	0	5	0	0	1.829	-0.617	0.42366
tr|A5AWT9|A5AWT9_VITVI	74	78	33	135	59	70	1.826	0.185	0.47289
tr|F6H7X9|F6H7X9_VITVI	5	1	0	1	0	0	1.81	-0.609	0.43487
tr|D7SR21|D7SR21_VITVI	6	8	6	4	6	4	1.807	-0.407	0.43673
tr|A5B8V0|A5B8V0_VITVI	0	2	0	10	2	1	1.795	0.806	0.491
tr|A5AZM8|A5AZM8_VITVI	0	0	0	4	1	1	1.696	0.757	0.54855
tr|D7SVW5|D7SVW5_VITVI	0	1	0	11	0	0	1.674	0.448	0.56137
tr|A5C9S3|A5C9S3_VITVI	7	2	0	3	1	0	1.651	-0.474	0.53184
tr|E0CQB3|E0CQB3_VITVI	92	93	65	104	77	77	1.629	-0.133	0.54515
tr|F6HCL5|F6HCL5_VITVI	0	0	0	3	1	1	1.591	0.689	0.60749
tr|F6I0G4|F6I0G4_VITVI	32	35	30	43	31	20	1.467	-0.197	0.63904
tr|A5B2B6|A5B2B6_VITVI	4	4	3	2	2	3	1.452	-0.396	0.64692
tr|F6H776|F6H776_VITVI	45	34	3	14	16	26	1.447	-0.413	0.64947
tr|F6H3X3|F6H3X3_VITVI	14	12	8	10	10	9	1.356	-0.285	0.69636
tr|D7T293|D7T293_VITVI	2	1	1	6	2	2	1.354	0.405	0.72445
tr|D7T828|D7T828_VITVI	7	5	3	7	0	1	1.324	-0.569	0.71152
tr|A5AIY9|A5AIY9_VITVI	9	7	11	6	8	8	1.303	-0.3	0.72096
tr|F6GXY7|F6GXY7_VITVI	11	8	8	8	9	5	1.296	-0.315	0.7245
tr|D7TQI6|D7TQI6_VITVI	4	23	4	8	27	22	1.274	0.362	0.75716
tr|F6H4J9|F6H4J9_VITVI	1	0	0	3	1	2	1.269	0.55	0.75908
tr|F6HS61|F6HS61_VITVI	14	19	3	23	15	19	1.267	0.276	0.75982
tr|F6HNS0|F6HNS0_VITVI	16	18	22	39	21	22	1.241	0.206	0.76936
tr|A5C7G0|A5C7G0_VITVI	1	0	0	6	0	0	1.209	0.389	0.78099
tr|F6HH88|F6HH88_VITVI	0	0	0	1	0	2	1.189	0.465	0.78772
tr|F6H6H7|F6H6H7_VITVI	0	0	0	2	0	0	1.16	0.327	0.79728
tr|D7T5Q6|D7T5Q6_VITVI	4	3	4	10	5	4	1.076	0.279	0.82194
tr|D7SI17|D7SI17_VITVI	7	7	0	8	1	3	1.038	-0.203	0.81949
tr|A5B4P9|A5B4P9_VITVI	21	20	28	27	17	23	1.033	-0.181	0.82084
tr|F6GUE9|F6GUE9_VITVI	224	238	172	291	219	207	1.028	-0.046	0.82238
tr|F6HIK4|F6HIK4_VITVI	1	1	0	3	1	0	0.947	0.174	1
tr|D7TPF3|D7TPF3_VITVI	4	4	0	4	1	2	0.932	-0.154	1
tr|A5B179|A5B179_VITVI	1	15	0	3	2	5	0.903	-0.112	1
tr|A5AIZ1|A5AIZ1_VITVI	6	4	0	13	2	6	0.9	0.433	1
tr|F6HSU5|F6HSU5_VITVI	1	2	0	5	0	0	0.88	0.067	1
tr|D7SVH6|D7SVH6_VITVI	0	1	5	4	0	0	0.872	-0.224	1
tr|D7TQ09|D7TQ09_VITVI	20	14	18	20	14	17	0.863	-0.158	1
tr|A5B2E1|A5B2E1_VITVI	4	4	5	9	1	2	0.839	-0.205	1
tr|D7SVP1|D7SVP1_VITVI	4	6	0	0	5	2	0.834	-0.35	1
tr|D7SKW9|D7SKW9_VITVI	2	0	6	10	2	0	0.812	0.168	1
tr|A5BB66|A5BB66_VITVI	5	0	0	5	1	0	0.8	0.087	1
tr|F6GUF3|F6GUF3_VITVI	0	2	5	3	8	5	0.799	0.486	1
tr|Q9M4G7|Q9M4G7_VITVI	6	8	8	4	12	19	0.798	0.16	1
tr|A5AIJ0|A5AIJ0_VITVI	14	12	8	18	9	7	0.785	-0.148	1
tr|A5B7N6|A5B7N6_VITVI	3	2	0	2	2	1	0.785	-0.067	1
tr|F6HSV1|F6HSV1_VITVI	59	43	41	82	40	35	0.769	-0.074	1
tr|A5BZS1|A5BZS1_VITVI	4	3	0	20	1	1	0.76	0.436	1
tr|F6HQS7|F6HQS7_VITVI	201	208	58	208	172	132	0.754	-0.047	1
tr|A5BMY7|A5BMY7_VITVI	0	0	5	4	0	0	0.746	-0.037	1
tr|Q9M4G6|Q9M4G6_VITVI	1	1	25	4	6	5	0.734	0.119	1
tr|A5AID0|A5AID0_VITVI	1	9	6	11	3	2	0.734	-0.114	1
tr|F6H158|F6H158_VITVI	14	13	0	20	4	6	0.73	-0.026	1
tr|Q9ZTK4|Q9ZTK4_VITVI	14	14	13	19	13	13	0.708	-0.074	1
tr|F6HIL5|F6HIL5_VITVI	71	89	30	95	57	60	0.699	-0.06	1
tr|F6GU88|F6GU88_VITVI	5	6	0	19	1	2	0.692	0.264	1
tr|D7TXW6|D7TXW6_VITVI	35	34	31	58	29	24	0.682	-0.061	1
tr|D7TPI6|D7TPI6_VITVI	10	14	10	25	12	8	0.68	0.093	1
tr|A5BH21|A5BH21_VITVI	6	1	0	5	2	1	0.68	0.05	1
tr|A5AZD0|A5AZD0_VITVI	7	5	1	7	4	5	0.679	0.033	1
tr|F6HB09|F6HB09_VITVI	0	1	16	3	5	3	0.649	0.171	1
tr|F6H3K5|F6H3K5_VITVI	3	10	0	5	2	9	0.646	0.071	1
tr|E0CQB9|E0CQB9_VITVI	7	8	0	11	4	2	0.643	-0.003	1
tr|O24530|O24530_VITVI	0	0	6	3	2	2	0.609	0.236	1
tr|A5AZU5|A5AZU5_VITVI	18	4	0	11	2	11	0.6	0.103	1
tr|D7UBD5|D7UBD5_VITVI	11	10	0	11	6	6	0.573	-0.017	1
tr|D7TY88|D7TY88_VITVI	8	13	0	15	11	9	0.436	0.332	1
tr|F6I357|F6I357_VITVI	32	36	0	14	39	66	0.275	0.264	1
